# Supplementary material
Source: publisher site journal article supplement (https://www.spandidos-publications.com/5626/downloadSupplementary)

Figure S1. TgESPs promote hBMSCs cell migration and adhesion. (A) Wound healing assay of hBMSCs treated with TgESPs (0, 1, and 10  $\mu\text{g/ml}$ ) (scale bar, 250  $\mu\text{m}$ ). (B) Quantification of cell migration distance for (A). (C) hBMSCs were treated with TgESPs (0, 1, and 10  $\mu\text{g/ml}$ ) for 24 h, and the cell adhesion rate was measured by an MTS assay. \* $P < 0.05$ ; \*\* $P < 0.01$ ; \*\*\* $P < 0.001$ ; ns, no significance. TgESPs, *Toxoplasma gondii* excretory/secretory proteins; hBMSCs, human bone marrow mesenchymal stem cells.

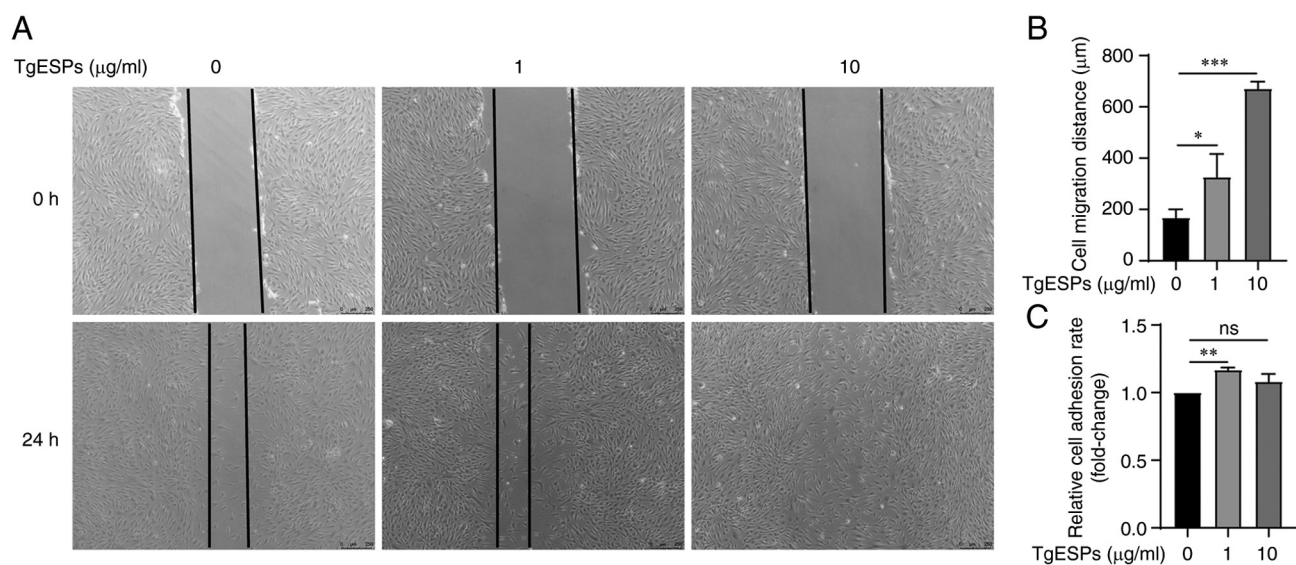

Supplement: Supplementary file 1 [file downloadSupplementary]
